# Supplementary material for: Phytoplankton Genera Structure Revealed from the Multispectral Vertical Diffuse Attenuation Coefficient
Source: MDPI journal article supplement (doi:10.3390/rs13204114), 2021-10-14
Supplement: s1 [file s1]

## Supplementary Materials

Supplementary Materials Table S1. Phytoplankton taxonomy.

| Class                    | Genera                     | Class                 | Genera                    |
|--------------------------|----------------------------|-----------------------|---------------------------|
| <i>Bacillariophyceae</i> | <i>Aulacoseira</i>         | <i>Cryptophyceae</i>  | <i>Chroomonas</i>         |
|                          | <i>Encyonema</i>           |                       | <i>Cryptomonas</i>        |
|                          | <i>Eunotia</i>             | <i>Crysoephyceae</i>  | <i>Dinobryon</i>          |
|                          | <i>Fragilaria</i>          |                       | <i>Mallomonas</i>         |
|                          | <i>Frustulia</i>           |                       | <i>Chromulina</i>         |
|                          | <i>Gomphonema</i>          |                       | <i>Chrysococcus</i>       |
|                          | <i>Gyrosigma</i>           |                       | <i>Anabaena</i>           |
|                          | <i>Melosira</i>            |                       | <i>Aphanocapsa</i>        |
|                          | <i>Nitzschia</i>           |                       | <i>Aphanothece</i>        |
|                          | <i>Pinnularia</i>          |                       | <i>Bacularia</i>          |
|                          | <i>Surirella</i>           |                       | <i>Chroococcus</i>        |
|                          | <i>Synedra</i>             |                       | <i>Coelomoron</i>         |
|                          | <i>Ulnaria</i>             |                       | <i>Coelosphaerium</i>     |
|                          | <i>Urosolenia</i>          |                       | <i>Cuspidothrix</i>       |
|                          | <i>Acanthosphaera</i>      | <i>Cyanophyceae</i>   | <i>Cyanodictyon</i>       |
| <i>Chlorophyceae</i>     | <i>Actinastrum</i>         |                       | <i>Cyanophyceae</i>       |
|                          | <i>Acutodesmus</i>         |                       | <i>Cylindrospermopsis</i> |
|                          | <i>Ankistrodesmus</i>      |                       | <i>Dolichospermum</i>     |
|                          | <i>Ankyra</i>              |                       | <i>Epigloeosphaera</i>    |
|                          | <i>Botryococcus</i>        |                       | <i>Geitlerinema</i>       |
|                          | <i>Chlamydomonas</i>       |                       | <i>Gomphosphaeria</i>     |
|                          | <i>Chlorella</i>           |                       | <i>Leptolyngbya</i>       |
|                          | <i>Choricystis</i>         |                       | <i>Limnothrix</i>         |
|                          | <i>Closteriopsis</i>       |                       | <i>Merismopedia</i>       |
|                          | <i>Crucigenia</i>          |                       | <i>Microcystis</i>        |
|                          | <i>Crucigeniella</i>       |                       | <i>Oscillatoria</i>       |
|                          | <i>Desmodesmus</i>         |                       | <i>Phormidium</i>         |
|                          | <i>Dicloster</i>           |                       | <i>Planktolyngbya</i>     |
|                          | <i>Dictyosphaerium</i>     |                       | <i>Planktothrix</i>       |
|                          | <i>Elakatothrix</i>        |                       | <i>Pseudanabaena</i>      |
|                          | <i>Eudorina</i>            |                       | <i>Radiocystis</i>        |
|                          | <i>Eutetramorus</i>        |                       | <i>Raphidiopsis</i>       |
|                          | <i>Golenkinia</i>          |                       | <i>Romeria</i>            |
|                          | <i>Kirchneriella</i>       |                       | <i>Spirulina</i>          |
|                          | <i>Koliella</i>            |                       | <i>Synechocystis</i>      |
|                          | <i>Monoraphidium</i>       |                       | <i>Tychonema</i>          |
|                          | <i>Oedogonium</i>          | <i>Dinophyceae</i>    | <i>Peridinium</i>         |
|                          | <i>Oocystis</i>            |                       | <i>Euglena</i>            |
|                          | <i>Pandorina</i>           | <i>Euglenophyceae</i> | <i>Lepocinclis</i>        |
|                          | <i>Pediastrum</i>          |                       | <i>Phacus</i>             |
|                          | <i>Pseudokirchneriella</i> |                       | <i>Strombomonas</i>       |
|                          | <i>Radiococcaceae</i>      | <i>Xanthophyceae</i>  | <i>Trachelomonas</i>      |
|                          | <i>Radiococcus</i>         |                       | <i>Goniochloris</i>       |
|                          | <i>Raphidocelis</i>        | <i>Zygnemaphyceae</i> | <i>Tetraedriella</i>      |
|                          | <i>Scenedesmus</i>         |                       | <i>Bambusina</i>          |
|                          | <i>Schroederia</i>         |                       | <i>Closterium</i>         |
|                          | <i>Staurastrum</i>         |                       | <i>Coelastrum</i>         |
|                          | <i>Tetrastrum</i>          |                       | <i>Cosmarium</i>          |
|                          | <i>Volvox</i>              |                       |                           |
